# Supplementary material for: First Evidence of Streptococcus pyogenes M1UK Clone in Pediatric Invasive Infections in Italy by Molecular Surveillance
Source: PubMed Central journal article supplement — Pediatr Infect Dis J. 2024 Jul 16;43(11):e421–4. doi: 10.1097/INF.0000000000004455 (PMC11460761; doi:10.1097/inf.0000000000004455), 2024-07-16
Supplement: inf-43-e421-s001.pdf [file inf-43-e421-s001.pdf]

**Supplemental Digital Content 1.** Patient and strain characteristics

| ID Patient | Age at the time of the infection (months) | Site of infection                                                        | Sample for microbiology investigation | iGAS | Emm-type  | Viral co-infection                    | Need for surgery | ICU Admission | Clinical cure/death |
|------------|-------------------------------------------|--------------------------------------------------------------------------|---------------------------------------|------|-----------|---------------------------------------|------------------|---------------|---------------------|
| 1          | 70                                        | Otomastoiditis complicated by thrombosis of the sigmoid sinus and sepsis | blood culture                         | Yes  | Emm1.0    | Influenza                             | Yes              | No            | Clinical cure       |
| 2          | 48                                        | Otomastoiditis complicated by meningitis                                 | CSF                                   | Yes  | Emm1.52   | No                                    | Yes              | Yes           | Death               |
| 3          | 60                                        | Otitis                                                                   | ear swab                              | No   | Emm12.101 | No                                    | No               | No            | Clinical cure       |
| 4          | 15                                        | Skin abscess                                                             | skin swab                             | No   | Emm89.0   | No                                    |                  | No            | Clinical cure       |
| 5          | 64                                        | Pneumonia with pleural effusion                                          | pleural fluid                         | Yes  | Emm1.52   | Adenovirus                            | Yes              | No            | Clinical cure       |
| 6          | 99                                        | Osteoarthritis complicated by sepsis                                     | blood culture                         | Yes  | Emm1.25   | No                                    | No               | No            | Clinical cure       |
| 7          | 14                                        | STSS with liver failure                                                  | blood culture                         | Yes  | Emm1.0    | Parainfluenza 3 and Rhino/Enterovirus | No               | Yes           | Clinical cure       |
| 8          | 98                                        | Septic arthritis                                                         | sinovial liquid                       | Yes  | Emm75.0   | No                                    | No               | No            | Clinical cure       |

iGAS: invasive GAS; ICU: Intensive Care Unit
